# Supplementary material
Source: MDPI journal article supplement (https://www.mdpi.com/1424-2818/9/4/45)
Supplement: s1 [file s1]

Archive with 5 entries (4 files):
- diversity-214641-supplementary -to final/
- diversity-214641-supplementary -to final/diversity-214641-supplementary Tables.docx
- diversity-214641-supplementary -to final/diversity-214641-supplementary Tables.pdf
- diversity-214641-supplementary -to final/diversity-214641-Supplementary-Figures.docx
- diversity-214641-supplementary -to final/diversity-214641-Supplementary-Figures.pdf
