# Supplementary material
Source: MDPI journal article supplement (https://www.mdpi.com/1424-2818/9/4/45)
Supplement: s1 [file s1 › diversity-214641-supplementary -to final/diversity-214641-supplementary Tables.docx]

Supplementary Materials: Patterns of Spontaneous Nucleotide Substitutions in Grape Processed Pseudogenes

Andrea Porceddu and Salvatore Camiolo

**Table S1** List of processed pseudogenes analyzed in this study. The Chr = scaffold molecule as in the gff file. The third and fourth columns reports the genomic coordinate of pseudogenes in the strand reportd in column two.

| **Chr** | **Strand** | **Start** | **End** | **Pater_Locus** | **Ks** | **Ka** | **Ka/Ks** |
| --- | --- | --- | --- | --- | --- | --- | --- |
| chr1 | + | 2327664 | 2327885 | VIT_02s0025g01220.t01 | 0.086 | 0.024 | 0.279 |
| chr1 | - | 7000737 | 7000385 | VIT_04s0044g01670.t01 | 0.058 | 0.058 | 0.997 |
| chr1 | + | 8290661 | 8290940 | VIT_16s0039g00310.t01 | 0.215 | 0.088 | 0.411 |
| chr1 | + | 9159921 | 9160172 | VIT_07s0031g02750.t01 | 0.188 | 0.078 | 0.417 |
| chr1 | - | 10322391 | 10322107 | VIT_17s0000g05880.t01 | 0.073 | 0.034 | 0.462 |
| chr1 | + | 10386156 | 10386805 | VIT_09s0002g07880.t01 | 0.108 | 0.094 | 0.868 |
| chr1 | - | 11696981 | 11696732 | VIT_15s0046g02390.t01 | 0.103 | 0.034 | 0.330 |
| chr1 | + | 16287427 | 16287651 | VIT_09s0054g00930.t01 | 0.197 | 0.071 | 0.361 |
| chr1 | + | 16288202 | 16288474 | VIT_06s0004g01890.t01 | 1.921 | 0.457 | 0.238 |
| chr1 | + | 16288487 | 16288771 | VIT_02s0025g03430.t01 | 0.250 | 0.089 | 0.354 |
| chr1 | - | 16330445 | 16329881 | VIT_01s0026g00220.t01 | 0.353 | 0.148 | 0.420 |
| chr1 | - | 19076741 | 19076487 | VIT_18s0001g12840.t01 | 0.223 | 0.138 | 0.618 |
| chr1 | - | 20813538 | 20813318 | VIT_14s0128g00220.t01 | 0.069 | 0.040 | 0.584 |
| chr1 | - | 22005427 | 22004952 | VIT_11s0016g02830.t01 | 0.115 | 0.125 | 1.089 |
| chr2 | + | 9393975 | 9394172 | VIT_18s0001g11380.t01 | 0.100 | 0.070 | 0.696 |
| chr2 | - | 9996801 | 9996301 | VIT_02s0025g02400.t01 | 0.157 | 0.090 | 0.575 |
| chr2 | + | 10259562 | 10259894 | VIT_15s0046g02460.t01 | 0.053 | 0.033 | 0.619 |
| chr2 | - | 12703945 | 12703578 | VIT_14s0128g00750.t01 | 0.157 | 0.089 | 0.568 |
| chr2 | - | 13091639 | 13091284 | VIT_15s0021g02730.t01 | 0.246 | 0.059 | 0.240 |
| chr2 | + | 13241432 | 13242044 | VIT_14s0006g02490.t01 | 0.076 | 0.064 | 0.852 |
| chr2 | - | 13551306 | 13550827 | VIT_07s0031g03110.t01 | 0.265 | 0.110 | 0.416 |
| chr2 | - | 14154406 | 14154115 | VIT_12s0059g01430.t01 | 0.148 | 0.089 | 0.601 |
| chr2 | - | 15413296 | 15412778 | VIT_06s0004g02480.t01 | 0.113 | 0.079 | 0.704 |
| chr2 | - | 15461674 | 15461239 | VIT_07s0191g00090.t01 | 0.333 | 0.176 | 0.530 |
| chr2 | + | 16133979 | 16134165 | VIT_09s0054g00890.t01 | 0.223 | 0.082 | 0.367 |
| chr2 | - | 16262802 | 16261664 | VIT_14s0083g00200.t01 | 0.101 | 0.036 | 0.359 |
| chr2 | - | 16443598 | 16443062 | VIT_14s0171g00520.t01 | 0.126 | 0.062 | 0.490 |
| chr2 | - | 16647976 | 16647688 | VIT_17s0000g07680.t01 | 0.092 | 0.063 | 0.680 |
| chr2 | + | 17533033 | 17533239 | VIT_14s0108g01680.t01 | 0.562 | 0.224 | 0.399 |
| chr3 | + | 795950 | 796168 | VIT_07s0005g05610.t01 | 0.110 | 0.099 | 0.898 |
| chr3 | - | 4438235 | 4438065 | VIT_08s0056g00440.t01 | 0.106 | 0.041 | 0.384 |
| chr3 | + | 4780007 | 4780260 | VIT_14s0066g00920.t01 | 0.094 | 0.051 | 0.545 |
| chr3 | - | 7774472 | 7773884 | VIT_11s0016g02430.t01 | 0.108 | 0.082 | 0.763 |
| chr3 | - | 7891323 | 7889076 | VIT_19s0015g01380.t01 | 0.081 | 0.053 | 0.659 |
| chr3 | + | 9755048 | 9755753 | VIT_13s0067g00600.t01 | 0.088 | 0.038 | 0.434 |
| chr3 | - | 15254133 | 15253715 | VIT_18s0122g00140.t01 | 0.178 | 0.082 | 0.462 |
| chr3 | - | 18274928 | 18274722 | VIT_12s0028g03140.t01 | 0.127 | 0.063 | 0.492 |
| chr3 | + | 18635932 | 18636465 | VIT_07s0129g00250.t01 | 0.128 | 0.092 | 0.719 |
| chr3 | - | 18900724 | 18900278 | VIT_18s0117g00150.t01 | 0.180 | 0.042 | 0.231 |
| chr4 | + | 17193 | 17423 | VIT_04s0023g03620.t01 | 0.181 | 0.095 | 0.525 |
| chr4 | + | 1894345 | 1894656 | VIT_01s0010g03370.t01 | 0.136 | 0.084 | 0.618 |
| chr4 | - | 7585623 | 7585366 | VIT_11s0016g05020.t01 | 0.169 | 0.067 | 0.397 |
| chr4 | + | 8177119 | 8177482 | VIT_07s0151g00430.t01 | 0.197 | 0.106 | 0.539 |
| chr4 | - | 8217298 | 8217041 | VIT_03s0017g01760.t01 | 0.080 | 0.039 | 0.494 |
| chr4 | - | 8400113 | 8399700 | VIT_13s0106g00490.t01 | 0.077 | 0.046 | 0.588 |
| chr4 | + | 8963333 | 8964656 | VIT_06s0061g01180.t01 | 0.085 | 0.035 | 0.416 |
| chr4 | - | 9473168 | 9472775 | VIT_18s0001g09100.t01 | 0.219 | 0.122 | 0.558 |
| chr4 | - | 15596174 | 15595845 | VIT_17s0000g00280.t01 | 0.123 | 0.068 | 0.557 |
| chr4 | - | 15678559 | 15678395 | VIT_09s0002g00880.t01 | 0.176 | 0.058 | 0.331 |
| chr4 | + | 16138021 | 16138395 | VIT_14s0081g00490.t01 | 0.241 | 0.122 | 0.508 |
| chr4 | + | 16919673 | 16919852 | VIT_04s0008g03120.t01 | 0.215 | 0.110 | 0.510 |
| chr4 | - | 17750766 | 17750583 | VIT_17s0000g03760.t01 | 0.091 | 0.067 | 0.735 |
| chr4 | - | 17909593 | 17909288 | VIT_18s0001g07800.t01 | 0.197 | 0.095 | 0.480 |
| chr5 | + | 2068481 | 2068705 | VIT_08s0056g01710.t01 | 0.060 | 0.068 | 1.126 |
| chr5 | + | 5787293 | 5787514 | VIT_19s0085g00690.t01 | 0.117 | 0.065 | 0.555 |
| chr5 | - | 7057315 | 7056828 | VIT_14s0068g01890.t01 | 0.076 | 0.039 | 0.517 |
| chr5 | - | 9734355 | 9734028 | VIT_07s0031g00320.t01 | 0.069 | 0.038 | 0.545 |
| chr5 | - | 10380383 | 10378921 | VIT_09s0002g03490.t01 | 0.123 | 0.064 | 0.519 |
| chr5 | - | 11007512 | 11007093 | VIT_06s0080g00800.t01 | 0.183 | 0.086 | 0.471 |
| chr5 | + | 13494965 | 13495168 | VIT_18s0001g07220.t01 | 0.215 | 0.085 | 0.393 |
| chr5 | + | 15356424 | 15356888 | VIT_07s0031g02400.t01 | 0.084 | 0.040 | 0.469 |
| chr5 | - | 17217482 | 17217163 | VIT_08s0007g05370.t01 | 0.381 | 0.127 | 0.332 |
| chr5 | - | 23991801 | 23991619 | VIT_04s0008g00800.t01 | 0.297 | 0.099 | 0.332 |
| chr5 | + | 24041027 | 24041338 | VIT_09s0002g00610.t01 | 0.182 | 0.087 | 0.476 |
| chr5 | + | 24042046 | 24042255 | VIT_16s0022g02110.t01 | 0.234 | 0.113 | 0.485 |
| chr6 | + | 6977317 | 6977520 | VIT_07s0104g01240.t01 | 0.131 | 0.071 | 0.544 |
| chr6 | + | 8005933 | 8006481 | VIT_02s0025g03950.t01 | 0.080 | 0.056 | 0.698 |
| chr6 | + | 8524048 | 8524272 | VIT_10s0003g05840.t01 | 0.129 | 0.059 | 0.459 |
| chr6 | + | 12127219 | 12127431 | VIT_08s0040g00230.t01 | 0.191 | 0.099 | 0.519 |
| chr6 | - | 12575700 | 12574868 | VIT_11s0037g00230.t01 | 0.091 | 0.053 | 0.583 |
| chr6 | + | 12793918 | 12794186 | VIT_14s0083g00540.t01 | 0.237 | 0.123 | 0.519 |
| chr6 | + | 13291786 | 13292154 | VIT_02s0025g04100.t01 | 0.242 | 0.178 | 0.736 |
| chr6 | + | 14584009 | 14584244 | VIT_11s0016g00100.t01 | 0.185 | 0.087 | 0.469 |
| chr6 | + | 14584565 | 14584723 | VIT_16s0050g02670.t01 | 0.217 | 0.133 | 0.613 |
| chr6 | - | 14918428 | 14918022 | VIT_03s0038g03940.t01 | 0.409 | 0.190 | 0.464 |
| chr6 | - | 15495004 | 15494807 | VIT_19s0015g01940.t01 | 0.328 | 0.051 | 0.156 |
| chr6 | + | 16425154 | 16425438 | VIT_08s0056g00210.t01 | 0.256 | 0.144 | 0.561 |
| chr6 | + | 16425664 | 16426035 | VIT_08s0007g02160.t01 | 0.060 | 0.082 | 1.367 |
| chr6 | + | 16529988 | 16530357 | VIT_10s0003g01530.t01 | 0.092 | 0.060 | 0.644 |
| chr6 | - | 16990580 | 16990139 | VIT_03s0038g02760.t01 | 0.112 | 0.098 | 0.869 |
| chr7 | + | 3173761 | 3174497 | VIT_05s0020g04480.t01 | 0.108 | 0.051 | 0.473 |
| chr7 | - | 5238575 | 5237912 | VIT_16s0022g00750.t01 | 0.125 | 0.056 | 0.447 |
| chr7 | + | 5667540 | 5667766 | VIT_18s0089g00910.t01 | 0.121 | 0.065 | 0.540 |
| chr7 | - | 5818987 | 5818735 | VIT_16s0050g00160.t01 | 0.112 | 0.044 | 0.395 |
| chr7 | - | 6306530 | 6306131 | VIT_14s0068g01100.t01 | 0.378 | 0.154 | 0.408 |
| chr7 | - | 11553769 | 11553542 | VIT_09s0002g02500.t01 | 0.258 | 0.111 | 0.431 |
| chr7 | - | 12726209 | 12725974 | VIT_10s0116g00970.t01 | 0.108 | 0.009 | 0.080 |
| chr7 | + | 13704778 | 13705191 | VIT_17s0053g00780.t01 | 0.168 | 0.123 | 0.731 |
| chr7 | - | 18625648 | 18625104 | VIT_06s0004g00470.t01 | 0.736 | 0.159 | 0.216 |
| chr7 | + | 19908351 | 19908757 | VIT_06s0004g02140.t01 | 0.216 | 0.150 | 0.693 |
| chr8 | + | 538476 | 538877 | VIT_03s0038g00220.t01 | 0.141 | 0.061 | 0.433 |
| chr8 | - | 585610 | 585243 | VIT_08s0040g01640.t01 | 0.165 | 0.108 | 0.653 |
| chr8 | - | 1594534 | 1594244 | VIT_11s0016g00360.t01 | 0.486 | 0.222 | 0.458 |
| chr8 | + | 2312555 | 2313159 | VIT_14s0171g00350.t01 | 0.389 | 0.151 | 0.388 |
| chr8 | - | 4699635 | 4699142 | VIT_18s0001g00500.t01 | 0.175 | 0.141 | 0.804 |
| chr8 | - | 5391404 | 5391195 | VIT_19s0014g02750.t01 | 0.239 | 0.135 | 0.563 |
| chr8 | + | 5576114 | 5576719 | VIT_13s0064g00730.t01 | 0.037 | 0.061 | 1.661 |
| chr8 | - | 7079786 | 7079577 | VIT_02s0025g02440.t01 | 0.173 | 0.103 | 0.595 |
| chr8 | - | 7101719 | 7101426 | VIT_10s0003g01150.t01 | 0.106 | 0.049 | 0.462 |
| chr8 | + | 7679411 | 7680519 | VIT_07s0005g01280.t01 | 0.130 | 0.078 | 0.600 |
| chr8 | + | 10893882 | 10894164 | VIT_19s0085g01020.t01 | 0.083 | 0.023 | 0.274 |
| chr8 | + | 11833874 | 11834158 | VIT_14s0060g02200.t01 | 0.164 | 0.153 | 0.937 |
| chr8 | - | 16747781 | 16747563 | VIT_03s0180g00270.t01 | 0.148 | 0.046 | 0.312 |
| chr8 | - | 19258507 | 19258262 | VIT_00s0199g00110.t01 | 0.202 | 0.088 | 0.436 |
| chr9 | - | 949555 | 948852 | VIT_17s0000g07470.t01 | 0.358 | 0.185 | 0.518 |
| chr9 | - | 949965 | 949737 | VIT_12s0057g01220.t01 | 0.060 | 0.040 | 0.675 |
| chr9 | + | 1728372 | 1728772 | VIT_01s0011g03350.t01 | 0.207 | 0.084 | 0.409 |
| chr9 | - | 6822176 | 6821881 | VIT_03s0097g00550.t01 | 0.100 | 0.033 | 0.332 |
| chr9 | - | 11547707 | 11547327 | VIT_05s0062g01190.t01 | 0.077 | 0.025 | 0.323 |
| chr9 | + | 12347624 | 12348129 | VIT_03s0038g00700.t01 | 0.117 | 0.064 | 0.542 |
| chr9 | - | 14430966 | 14430213 | VIT_07s0005g03100.t01 | 0.103 | 0.081 | 0.792 |
| chr9 | - | 14770403 | 14770217 | VIT_19s0014g01390.t01 | 0.247 | 0.140 | 0.565 |
| chr9 | - | 15089712 | 15089032 | VIT_14s0171g00480.t01 | 0.235 | 0.074 | 0.314 |
| chr9 | - | 19131784 | 19131302 | VIT_07s0031g01350.t01 | 0.202 | 0.082 | 0.404 |
| chr9 | - | 21290329 | 21289946 | VIT_14s0060g01100.t01 | 0.095 | 0.062 | 0.652 |
| chr10 | - | 3334304 | 3333994 | VIT_04s0044g01700.t01 | 0.094 | 0.038 | 0.408 |
| chr10 | + | 7059964 | 7060308 | VIT_00s0337g00090.t01 | 0.208 | 0.099 | 0.477 |
| chr10 | + | 8662033 | 8662223 | VIT_08s0007g08180.t01 | 0.123 | 0.048 | 0.391 |
| chr10 | - | 9615244 | 9614278 | VIT_13s0019g02940.t01 | 0.893 | 0.239 | 0.268 |
| chr10 | - | 10082102 | 10081892 | VIT_17s0000g02860.t01 | 0.240 | 0.131 | 0.545 |
| chr10 | + | 12255214 | 12256352 | VIT_07s0104g00390.t01 | 0.072 | 0.065 | 0.908 |
| chr10 | + | 12572411 | 12573150 | VIT_07s0141g00830.t01 | 0.151 | 0.069 | 0.456 |
| chr10 | - | 13032052 | 13031669 | VIT_14s0066g02550.t01 | 0.094 | 0.074 | 0.783 |
| chr10 | - | 13150171 | 13149762 | VIT_09s0002g00790.t01 | 0.198 | 0.072 | 0.362 |
| chr10 | - | 13769377 | 13769071 | VIT_18s0122g00620.t01 | 0.084 | 0.039 | 0.457 |
| chr10 | + | 14164681 | 14165488 | VIT_03s0017g00830.t01 | 0.190 | 0.075 | 0.393 |
| chr10 | + | 15062723 | 15063349 | VIT_04s0008g06580.t01 | 0.109 | 0.057 | 0.523 |
| chr10 | + | 16274206 | 16274565 | VIT_14s0083g00940.t01 | 0.426 | 0.156 | 0.367 |
| chr10 | + | 18011992 | 18012930 | VIT_04s0023g03360.t01 | 0.285 | 0.146 | 0.513 |
| chr10 | + | 18112962 | 18113747 | VIT_09s0002g07880.t01 | 0.831 | 0.156 | 0.187 |
| chr11 | + | 19099 | 19362 | VIT_18s0001g03060.t01 | 0.183 | 0.107 | 0.584 |
| chr11 | - | 5658226 | 5657984 | VIT_02s0012g00900.t01 | 0.019 | 0.054 | 2.846 |
| chr11 | + | 6699547 | 6700074 | VIT_07s0005g04550.t01 | 0.079 | 0.052 | 0.658 |
| chr11 | - | 7547788 | 7547422 | VIT_08s0007g07850.t01 | 0.202 | 0.115 | 0.566 |
| chr11 | + | 9403822 | 9404319 | VIT_13s0019g00590.t01 | 0.284 | 0.096 | 0.337 |
| chr11 | + | 11682130 | 11682723 | VIT_08s0040g00910.t01 | 0.089 | 0.078 | 0.872 |
| chr11 | + | 13565919 | 13566101 | VIT_01s0011g02820.t01 | 0.164 | 0.174 | 1.061 |
| chr11 | + | 14561049 | 14561306 | VIT_16s0013g01530.t01 | 0.404 | 0.132 | 0.327 |
| chr11 | - | 14626771 | 14626439 | VIT_03s0038g04460.t01 | 0.201 | 0.084 | 0.417 |
| chr12 | + | 2167301 | 2167623 | VIT_11s0037g00070.t01 | 0.208 | 0.156 | 0.753 |
| chr12 | - | 2250272 | 2250048 | VIT_03s0038g00800.t01 | 0.249 | 0.070 | 0.283 |
| chr12 | - | 2489186 | 2488571 | VIT_01s0011g01590.t01 | 0.137 | 0.082 | 0.598 |
| chr12 | - | 6501649 | 6501229 | VIT_06s0009g00960.t01 | 0.121 | 0.057 | 0.473 |
| chr12 | - | 7704446 | 7703709 | VIT_18s0001g09990.t01 | 0.469 | 0.232 | 0.494 |
| chr12 | - | 9044921 | 9044101 | VIT_18s0001g10090.t01 | 0.176 | 0.129 | 0.733 |
| chr12 | - | 9114872 | 9114609 | VIT_01s0026g02170.t01 | 0.133 | 0.067 | 0.502 |
| chr12 | + | 9452257 | 9452619 | VIT_14s0030g00710.t01 | 0.073 | 0.074 | 1.003 |
| chr12 | + | 9814719 | 9815220 | VIT_18s0001g12300.t01 | 0.092 | 0.052 | 0.567 |
| chr12 | + | 12319442 | 12319699 | VIT_06s0004g01200.t01 | 0.108 | 0.035 | 0.327 |
| chr12 | - | 12490210 | 12489745 | VIT_16s0098g01160.t01 | 0.205 | 0.108 | 0.529 |
| chr12 | - | 12539860 | 12539336 | VIT_13s0073g00610.t01 | 0.106 | 0.057 | 0.540 |
| chr12 | + | 15644704 | 15644925 | VIT_19s0090g01250.t01 | 0.266 | 0.094 | 0.354 |
| chr12 | - | 15725032 | 15724800 | VIT_14s0006g00960.t01 | 0.194 | 0.092 | 0.471 |
| chr12 | + | 15800563 | 15801027 | VIT_09s0002g00840.t01 | 0.311 | 0.176 | 0.565 |
| chr12 | + | 16951867 | 16952147 | VIT_13s0074g00710.t01 | 0.160 | 0.101 | 0.630 |
| chr12 | - | 19283643 | 19282964 | VIT_07s0104g01320.t01 | 0.059 | 0.043 | 0.734 |
| chr12 | + | 20511279 | 20511629 | VIT_11s0206g00130.t01 | 0.167 | 0.109 | 0.650 |
| chr12 | - | 21293158 | 21292486 | VIT_07s0005g03830.t01 | 0.068 | 0.024 | 0.349 |
| chr12 | + | 22373362 | 22373661 | VIT_08s0007g04380.t01 | 0.269 | 0.077 | 0.287 |
| chr13 | + | 892112 | 892372 | VIT_12s0059g02310.t01 | 5.881 | 0.339 | 0.058 |
| chr13 | - | 3763570 | 3763004 | VIT_04s0008g03170.t01 | 0.076 | 0.018 | 0.236 |
| chr13 | - | 4921986 | 4921260 | VIT_01s0011g03220.t01 | 0.225 | 0.094 | 0.417 |
| chr13 | + | 7730680 | 7730946 | VIT_06s0004g03600.t01 | 0.089 | 0.084 | 0.937 |
| chr13 | + | 7731550 | 7732401 | VIT_11s0016g00420.t01 | 0.149 | 0.050 | 0.338 |
| chr13 | - | 10051420 | 10051214 | VIT_04s0079g00160.t01 | 0.196 | 0.066 | 0.339 |
| chr13 | - | 10078897 | 10078259 | VIT_19s0014g01010.t01 | 0.119 | 0.051 | 0.427 |
| chr13 | - | 11500140 | 11499789 | VIT_04s0008g03750.t01 | 0.285 | 0.066 | 0.230 |
| chr13 | - | 13527104 | 13526793 | VIT_13s0064g01510.t01 | 0.203 | 0.049 | 0.240 |
| chr13 | + | 13718916 | 13719269 | VIT_09s0002g03380.t01 | 0.113 | 0.066 | 0.586 |
| chr13 | - | 16523492 | 16523207 | VIT_09s0002g01610.t01 | 0.170 | 0.086 | 0.506 |
| chr13 | + | 17966805 | 17968031 | VIT_02s0012g01240.t01 | 0.094 | 0.069 | 0.734 |
| chr13 | - | 19970472 | 19970215 | VIT_17s0000g02570.t01 | 0.089 | 0.058 | 0.653 |
| chr13 | + | 22571692 | 22572171 | VIT_08s0058g00490.t01 | 0.219 | 0.137 | 0.622 |
| chr14 | + | 739517 | 740098 | VIT_07s0104g00540.t01 | 0.150 | 0.062 | 0.415 |
| chr14 | + | 740128 | 740427 | VIT_05s0020g00410.t01 | 0.145 | 0.072 | 0.498 |
| chr14 | + | 3525711 | 3526016 | VIT_04s0023g01280.t01 | 0.132 | 0.021 | 0.158 |
| chr14 | - | 3776832 | 3776177 | VIT_11s0016g03540.t01 | 0.100 | 0.033 | 0.327 |
| chr14 | - | 5522017 | 5521827 | VIT_04s0023g01650.t01 | 0.267 | 0.113 | 0.422 |
| chr14 | + | 5526617 | 5527413 | VIT_08s0007g01790.t01 | 0.115 | 0.075 | 0.655 |
| chr14 | + | 5980244 | 5980915 | VIT_06s0004g00950.t01 | 0.083 | 0.033 | 0.401 |
| chr14 | + | 5983353 | 5983732 | VIT_19s0090g01570.t01 | 0.087 | 0.052 | 0.597 |
| chr14 | + | 7237811 | 7238443 | VIT_16s0100g00670.t01 | 0.170 | 0.075 | 0.442 |
| chr14 | - | 12099208 | 12098960 | VIT_07s0005g00690.t01 | 0.465 | 0.131 | 0.281 |
| chr14 | + | 13346501 | 13346782 | VIT_05s0020g02210.t01 | 0.268 | 0.068 | 0.252 |
| chr14 | + | 13823423 | 13823734 | VIT_18s0122g00550.t01 | 0.271 | 0.121 | 0.445 |
| chr14 | - | 14413670 | 14413324 | VIT_07s0005g05160.t01 | 0.187 | 0.155 | 0.824 |
| chr14 | - | 14579777 | 14579048 | VIT_07s0005g05520.t01 | 0.130 | 0.089 | 0.685 |
| chr14 | + | 14887132 | 14887496 | VIT_05s0062g00130.t01 | nan | 0.293 | nan |
| chr14 | + | 14945857 | 14946100 | VIT_01s0026g02280.t01 | 0.143 | 0.136 | 0.954 |
| chr14 | - | 15468211 | 15467938 | VIT_01s0011g04360.t01 | 0.119 | 0.073 | 0.613 |
| chr14 | + | 16031309 | 16032164 | VIT_15s0045g00500.t01 | 0.048 | 0.036 | 0.746 |
| chr14 | + | 16350117 | 16350482 | VIT_07s0031g01470.t01 | 0.099 | 0.103 | 1.039 |
| chr14 | + | 18958359 | 18958752 | VIT_12s0134g00460.t01 | 0.391 | 0.141 | 0.362 |
| chr14 | - | 19335572 | 19334974 | VIT_18s0001g08100.t01 | 0.042 | 0.031 | 0.747 |
| chr14 | + | 19564809 | 19565262 | VIT_11s0016g01730.t01 | 0.147 | 0.079 | 0.534 |
| chr14 | - | 25070072 | 25069557 | VIT_15s0046g01510.t01 | 0.151 | 0.043 | 0.287 |
| chr15 | - | 1901312 | 1900969 | VIT_03s0038g02660.t01 | 0.168 | 0.032 | 0.193 |
| chr15 | - | 2339421 | 2338750 | VIT_08s0007g07150.t01 | 0.115 | 0.073 | 0.635 |
| chr15 | - | 2579127 | 2578721 | VIT_04s0008g04820.t01 | 0.364 | 0.152 | 0.418 |
| chr15 | - | 2593125 | 2592633 | VIT_03s0063g00610.t01 | 0.100 | 0.072 | 0.715 |
| chr15 | - | 9049023 | 9048841 | VIT_09s0054g01120.t01 | 0.186 | 0.076 | 0.408 |
| chr15 | - | 9409029 | 9408781 | VIT_12s0059g00190.t01 | 0.168 | 0.060 | 0.356 |
| chr15 | - | 9498318 | 9498120 | VIT_07s0104g00230.t01 | 0.118 | 0.020 | 0.168 |
| chr15 | - | 10302390 | 10302121 | VIT_09s0002g01530.t01 | 0.165 | 0.062 | 0.373 |
| chr15 | - | 13342756 | 13342345 | VIT_06s0061g01450.t01 | 0.184 | 0.090 | 0.489 |
| chr15 | - | 13613030 | 13612745 | VIT_18s0001g10170.t01 | 0.161 | 0.089 | 0.553 |
| chr15 | - | 13614464 | 13614085 | VIT_00s0283g00020.t01 | 0.187 | 0.196 | 1.053 |
| chr16 | + | 2024050 | 2024286 | VIT_00s0630g00010.t01 | 0.017 | 0.022 | 1.307 |
| chr16 | - | 3436664 | 3436423 | VIT_18s0001g06770.t01 | 0.438 | 0.187 | 0.427 |
| chr16 | + | 3555204 | 3555431 | VIT_06s0080g00830.t01 | 0.181 | 0.130 | 0.717 |
| chr16 | + | 3556334 | 3556558 | VIT_18s0001g07280.t01 | 0.293 | 0.087 | 0.296 |
| chr16 | - | 4581029 | 4580148 | VIT_18s0001g07710.t01 | 0.112 | 0.082 | 0.729 |
| chr16 | - | 4600561 | 4600258 | VIT_04s0008g01430.t01 | 0.170 | 0.102 | 0.599 |
| chr16 | + | 4813025 | 4813310 | VIT_07s0151g00970.t01 | 0.097 | 0.061 | 0.627 |
| chr16 | + | 4844126 | 4844560 | VIT_17s0000g10430.t01 | 0.284 | 0.104 | 0.368 |
| chr16 | + | 7379082 | 7379532 | VIT_16s0022g01860.t01 | 0.114 | 0.070 | 0.618 |
| chr16 | - | 8531644 | 8531099 | VIT_10s0003g00500.t01 | 0.229 | 0.143 | 0.623 |
| chr16 | - | 8729927 | 8729549 | VIT_09s0018g01600.t01 | 0.248 | 0.098 | 0.397 |
| chr16 | + | 8946329 | 8946761 | VIT_18s0001g02510.t01 | 0.067 | 0.051 | 0.766 |
| chr16 | + | 9455911 | 9456266 | VIT_06s0009g03240.t01 | 0.161 | 0.072 | 0.446 |
| chr16 | + | 11667983 | 11668231 | VIT_11s0016g04200.t01 | 0.254 | 0.122 | 0.479 |
| chr16 | + | 11935612 | 11936463 | VIT_13s0019g03990.t01 | 0.143 | 0.110 | 0.766 |
| chr16 | - | 11958872 | 11958453 | VIT_03s0038g03100.t01 | 0.091 | 0.049 | 0.533 |
| chr16 | + | 15375585 | 15375833 | VIT_10s0092g00040.t01 | 0.088 | 0.041 | 0.463 |
| chr16 | + | 15489458 | 15489706 | VIT_18s0001g13950.t01 | 0.080 | 0.031 | 0.391 |
| chr17 | + | 6119829 | 6120146 | VIT_18s0089g00900.t01 | 0.076 | 0.064 | 0.839 |
| chr17 | + | 14851837 | 14852100 | VIT_08s0007g07220.t01 | 0.155 | 0.057 | 0.369 |
| chr17 | + | 16520669 | 16521370 | VVIT_04s0043g00220.t01 | 0.054 | 0.033 | 0.614 |
| chr17 | + | 16957818 | 16958102 | VIT_09s0002g00130.t01 | 0.181 | 0.108 | 0.593 |
| chr18 | - | 1824482 | 1823905 | VIT_08s0058g00730.t01 | 0.017 | 0.029 | 1.702 |
| chr18 | - | 3316054 | 3315523 | VIT_02s0025g00640.t01 | 0.168 | 0.078 | 0.466 |
| chr18 | - | 8221944 | 8220844 | VIT_12s0028g02240.t01 | 0.143 | 0.053 | 0.367 |
| chr18 | - | 11840526 | 11840234 | VIT_11s0103g00550.t01 | 0.074 | 0.134 | 1.819 |
| chr18 | - | 12773020 | 12772691 | VIT_16s0100g00690.t01 | 0.306 | 0.173 | 0.565 |
| chr18 | + | 13300722 | 13301659 | VIT_04s0008g03110.t01 | 0.123 | 0.050 | 0.409 |
| chr18 | + | 14275681 | 14276198 | VIT_09s0002g01430.t01 | 0.183 | 0.097 | 0.531 |
| chr18 | + | 18970374 | 18970625 | VIT_14s0060g00970.t01 | 0.074 | 0.041 | 0.558 |
| chr18 | + | 19249602 | 19250114 | VIT_17s0000g08580.t01 | 0.186 | 0.106 | 0.569 |
| chr18 | - | 20031108 | 20030734 | VIT_12s0059g00200.t01 | 0.050 | 0.039 | 0.792 |
| chr18 | - | 20702046 | 20701198 | VIT_08s0007g00340.t01 | 0.037 | 0.030 | 0.833 |
| chr18 | + | 22088371 | 22088925 | VIT_05s0077g02140.t01 | 0.090 | 0.063 | 0.700 |
| chr18 | - | 22332850 | 22332323 | VIT_02s0154g00180.t01 | 0.092 | 0.067 | 0.724 |
| chr18 | + | 22846414 | 22847323 | VIT_03s0038g04500.t01 | 0.164 | 0.099 | 0.605 |
| chr18 | + | 22932871 | 22933663 | VIT_18s0001g10120.t01 | 0.176 | 0.095 | 0.542 |
| chr18 | - | 23796070 | 23795686 | VIT_19s0015g01830.t01 | 0.138 | 0.114 | 0.825 |
| chr18 | + | 25751718 | 25752440 | VIT_08s0007g07130.t01 | 0.108 | 0.067 | 0.625 |
| chr18 | - | 27334486 | 27333982 | VIT_08s0007g07200.t01 | 0.069 | 0.051 | 0.736 |
| chr18 | + | 28018869 | 28019548 | VIT_15s0045g01090.t01 | 0.132 | 0.048 | 0.366 |
| chr18 | - | 28332343 | 28331961 | VIT_19s0014g03960.t01 | 0.280 | 0.119 | 0.425 |
| chr19 | + | 4028675 | 4029013 | VIT_04s0023g01610.t01 | 0.105 | 0.074 | 0.707 |
| chr19 | + | 9899872 | 9900317 | VIT_14s0066g01430.t01 | 0.333 | 0.115 | 0.346 |
| chr19 | + | 13249553 | 13250143 | VIT_01s0026g02340.t01 | 0.087 | 0.045 | 0.514 |
| chr19 | + | 15825052 | 15825349 | VIT_12s0028g01550.t01 | 0.119 | 0.048 | 0.400 |
| chr19 | + | 16715576 | 16715755 | VIT_05s0049g01160.t01 | 0.073 | 0.077 | 1.049 |
| chr19 | + | 18456141 | 18456419 | VIT_02s0087g00050.t01 | 0.241 | 0.206 | 0.852 |
| chr19 | + | 19776588 | 19777070 | VIT_16s0039g01890.t01 | 0.124 | 0.060 | 0.487 |
| chr19 | + | 20151928 | 20152361 | VIT_01s0026g00920.t01 | 0.177 | 0.071 | 0.402 |
| chr19 | + | 21999736 | 21999947 | VIT_02s0025g02760.t01 | 0.208 | 0.155 | 0.746 |
| chr19 | + | 22061066 | 22062073 | VIT_19s0014g03080.t01 | 0.174 | 0.116 | 0.666 |

**Table S2.** Summary of nucleotide substitutions in grape processed pseudogenes. Non synonymous dataset

|  | **Total** | **Unchanged** | | **Deleted** | | **Substituted** | | **Transitions** | | **Transversions** | | **Ratio** |
| --- | --- | --- | --- | --- | --- | --- | --- | --- | --- | --- | --- | --- |
| A | 26783 | 24925 | 93.06% | 430 | 1.60% | 1428 | 5.33% | 864 | 60.50% | 564 | 39.50% | 1.53 |
| G (all) | 23517 | 20400 | 86.75% | 402 | 1.71% | 2715 | 11.54% | 2095 | 77.16% | 620 | 22.84% | 3.38 |
| CpG | 1087 | 827 | 76.08% | 18 | 1.65% | 242 | 22.22% | 198 | 81.82% | 44 | 18.18% | 4.50 |
| non-CpG | 22430 | 19573 | 87.20%% | 384 | 1.71% | 2473 | 10.07% | 1897 | 76.68% | 527 | 21.31% | 3.29 |
| C(all) | 19110 | 16406 | 85.85% | 298 | 1.55% | 2406 | 12.59% | 1870 | 77.72% | 536 | 28.66% | 3.49 |
| Cpg | 1087 | 862 | 79.30% | 18 | 1.00% | 223 | 20.51% | 166 | 74.43% | 41 | 24.70% | 4.05 |
| non CpG | 18023 | 15544 | 86.58% | 268 | 1.49% | 2183 | 12.11% | 1584 | 72.50% | 455 | 20.84% | 3.48 |
| T | 21876 | 20456 | 93.51% | 312 | 1.42% | 1108 | 5.06% | 673 | 60.74% | 435 | 39.26% | 1.55 |
