# Supplementary material
Source: MDPI journal article supplement (https://www.mdpi.com/1424-2818/9/4/45)
Supplement: s1 [file s1 › diversity-214641-supplementary -to final/diversity-214641-Supplementary-Figures.docx]

Supplementary Materials: Patterns of Spontaneous Nucleotide Substitutions in Grape Processed Pseudogenes

Andrea Porceddu and Salvatore Camiolo


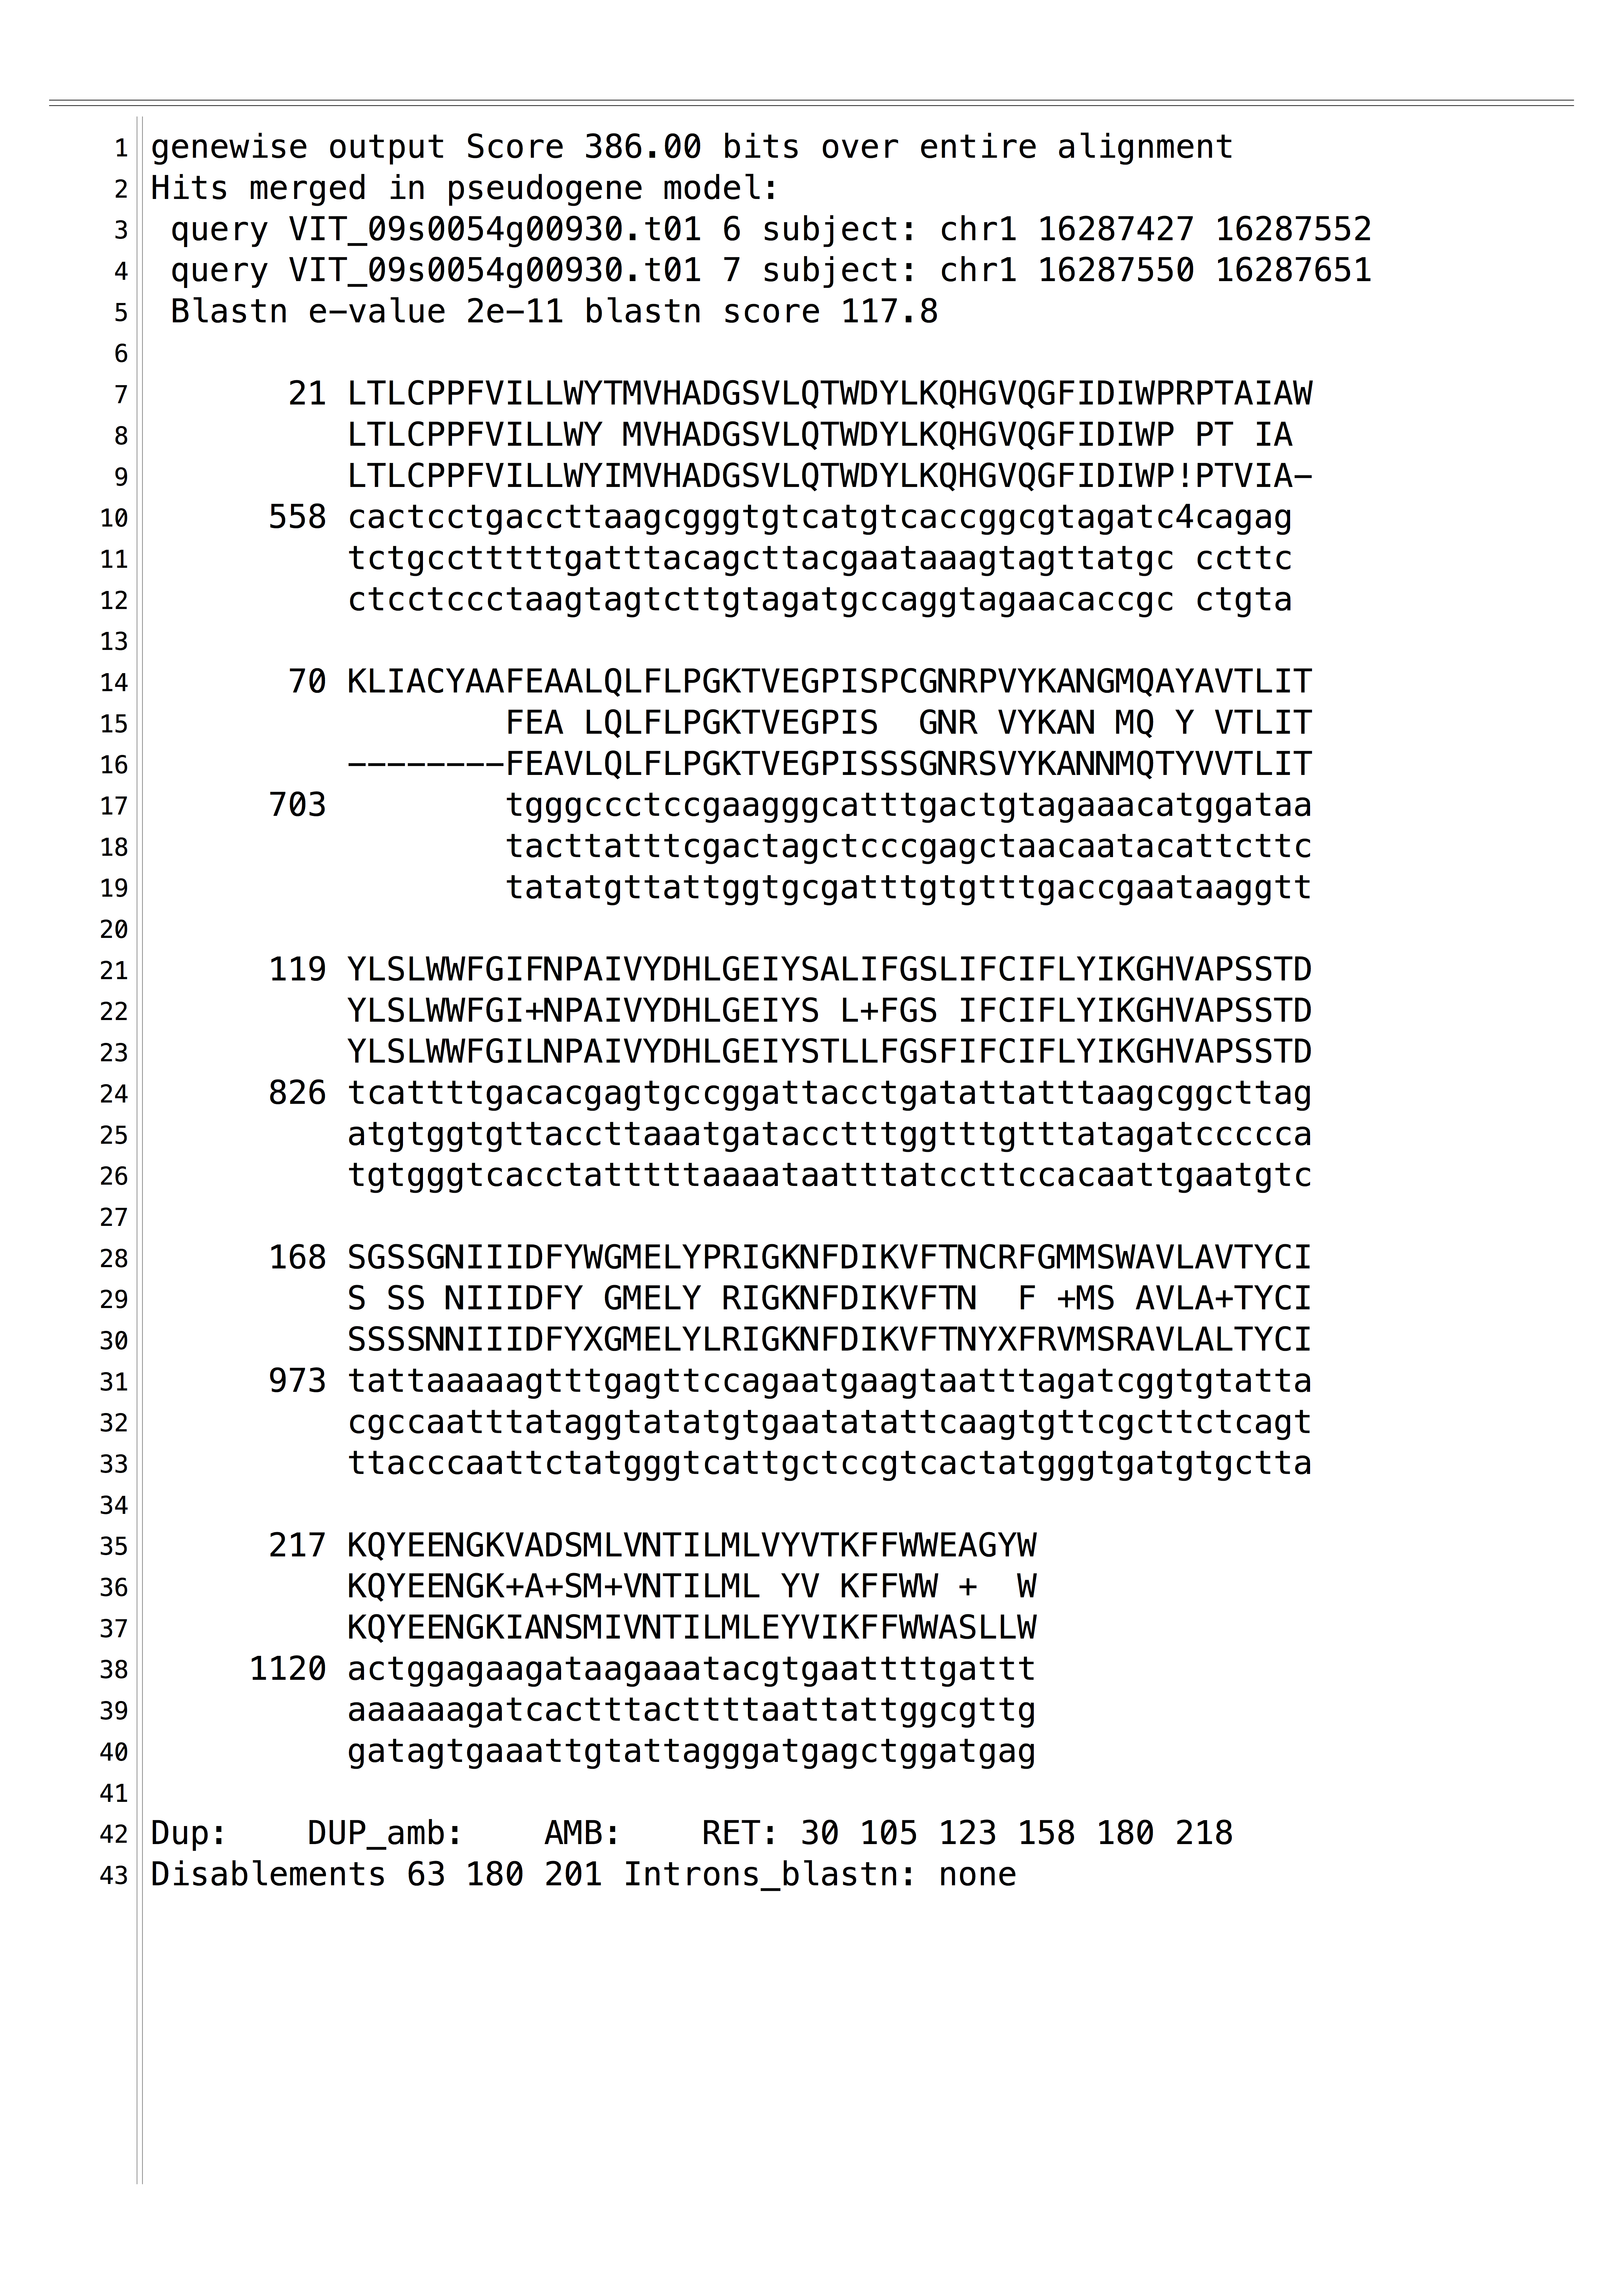


**Figure S1.** Pseudogene–pater locus alignment.


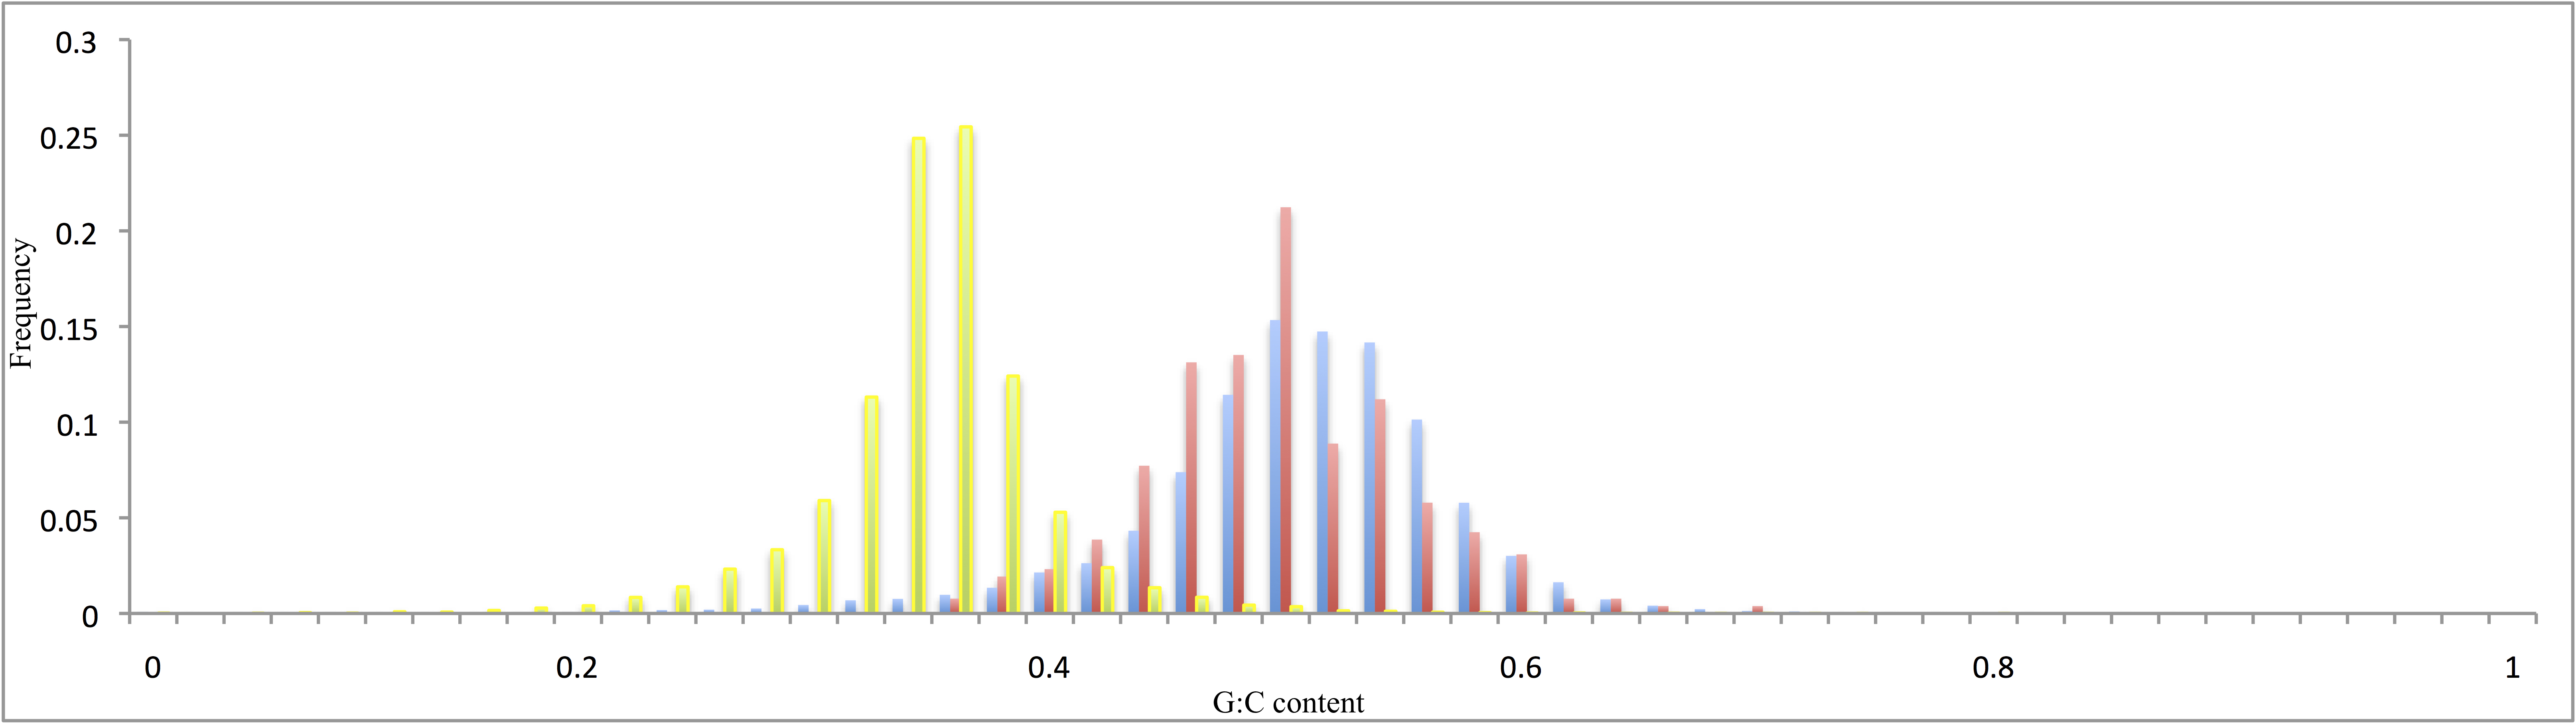


**Figure S2.** GC3 content of pseudogenes and functional genes.

| 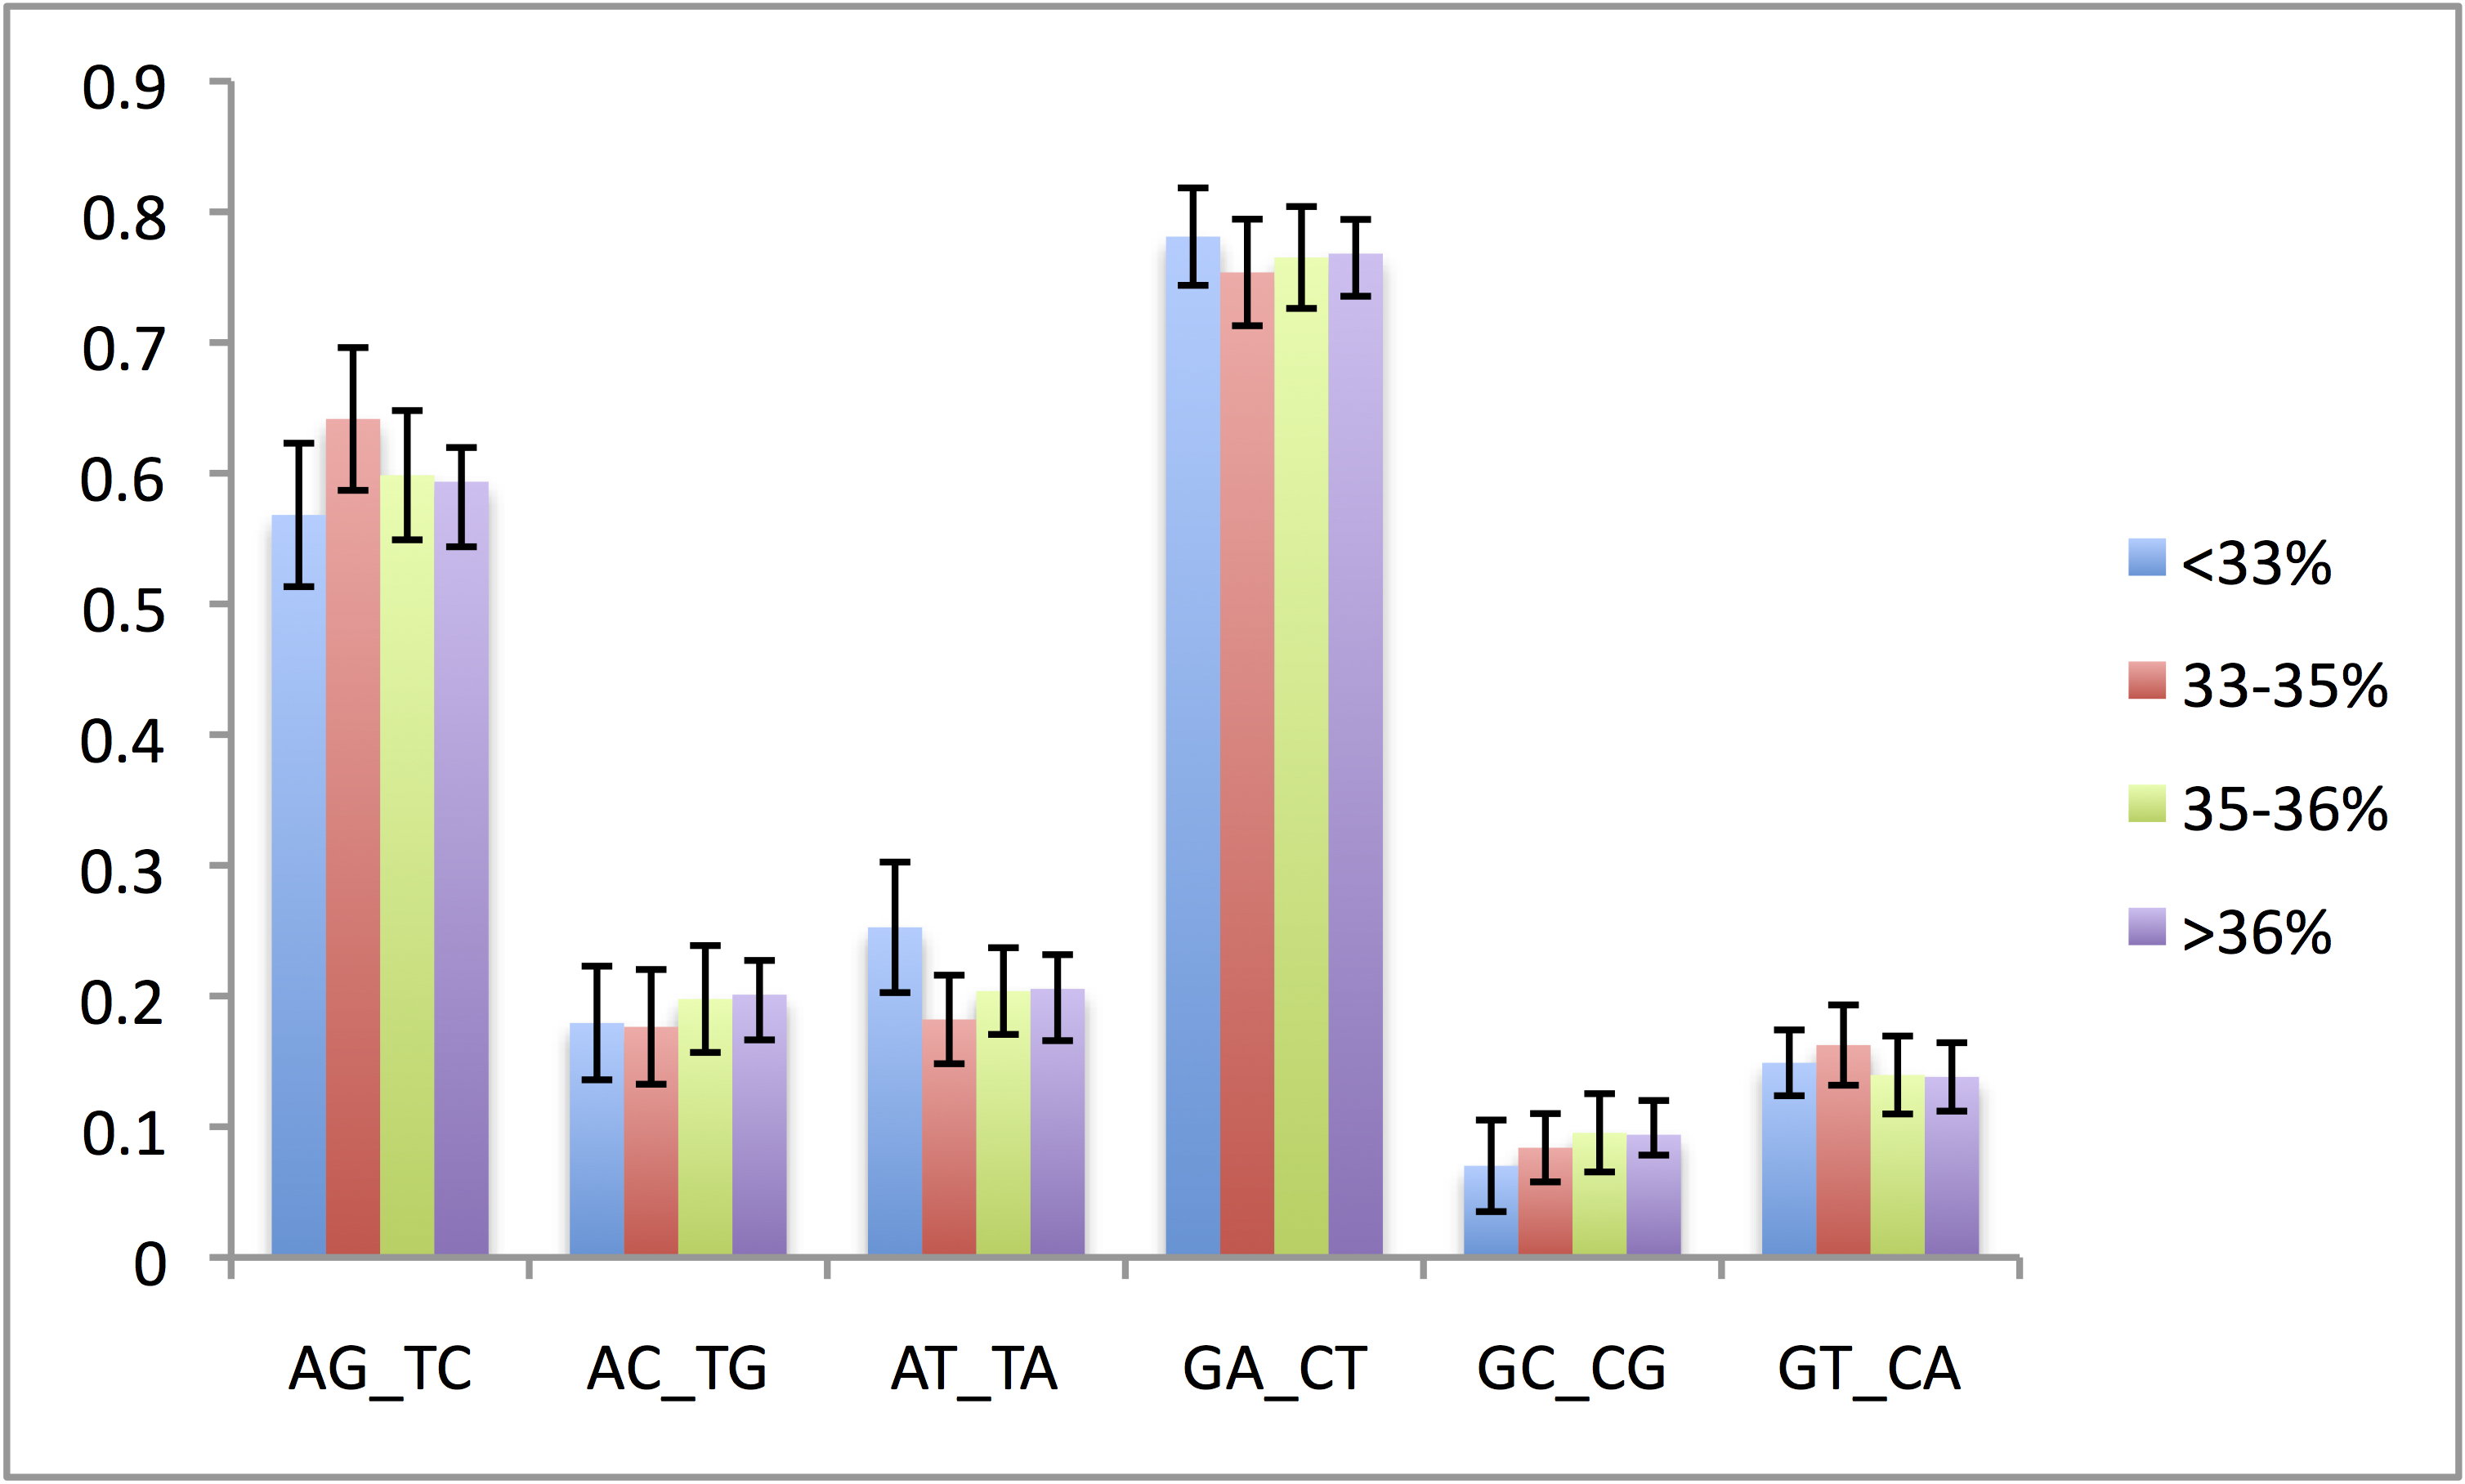 |
| --- |
| (**a**) |
| 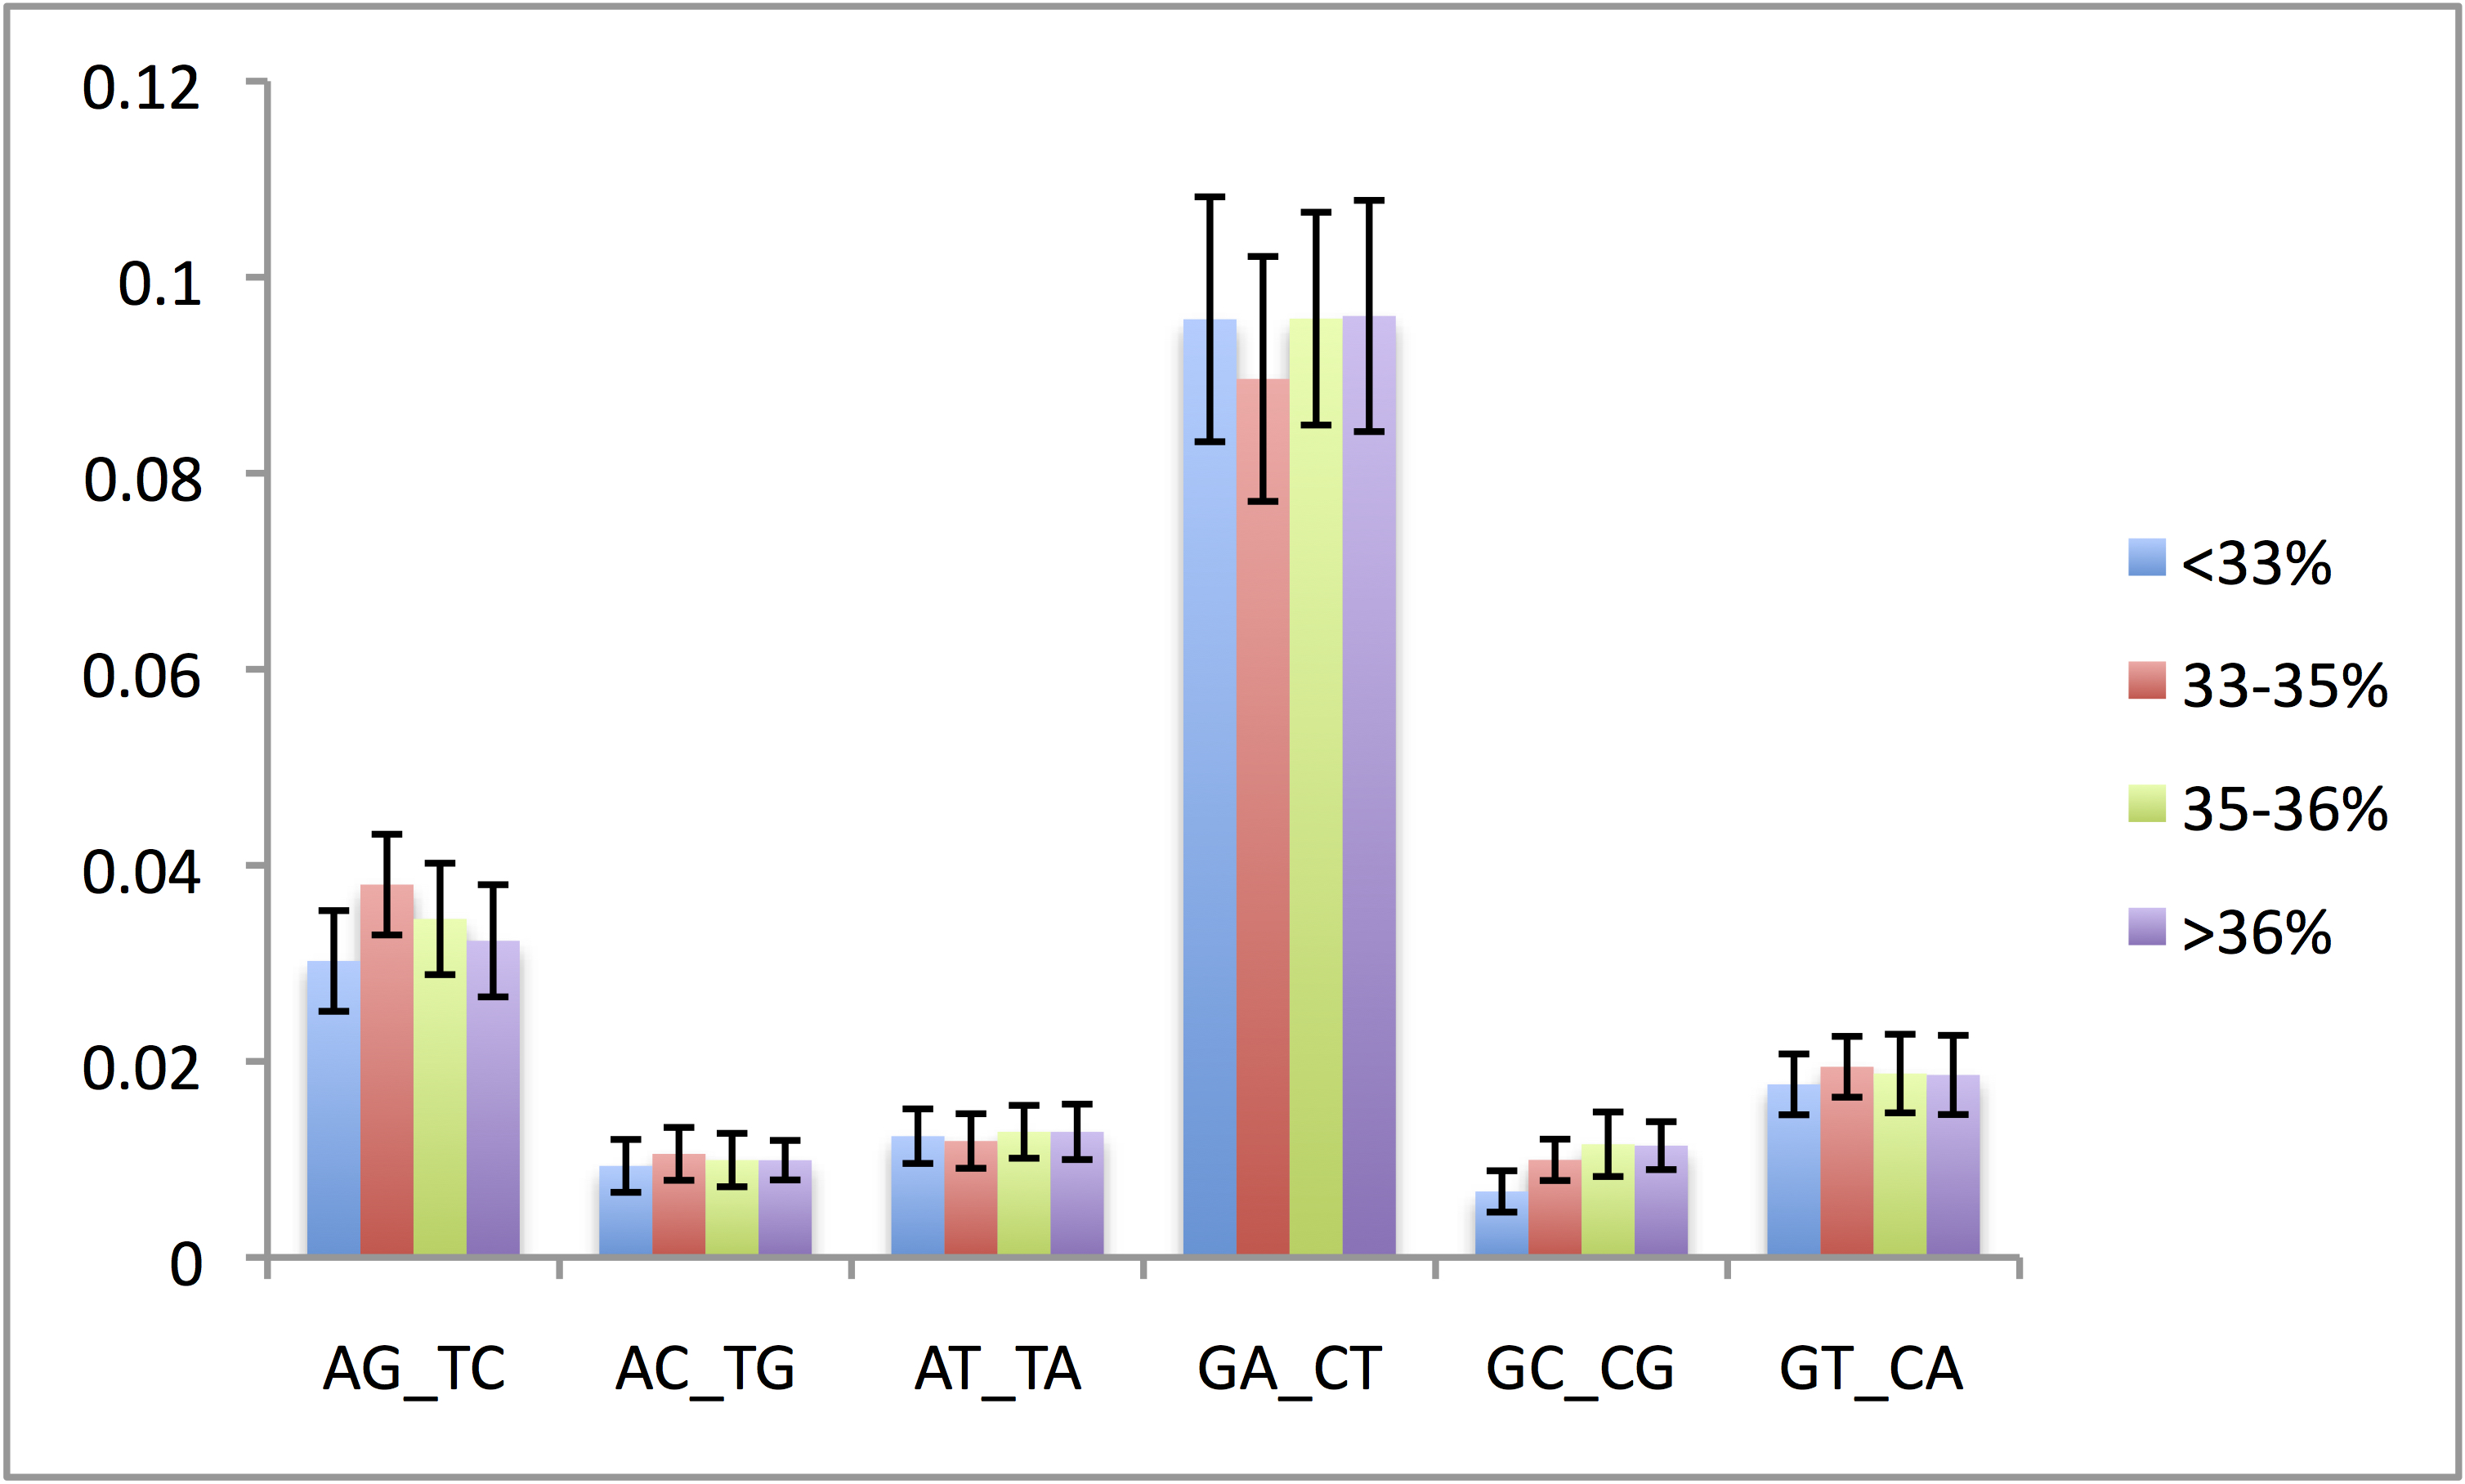 |
| (**b**) |

**Figure S3.** Substitution patterns between nucleotide pairs (non-synonymous dataset).
